# Supplementary material
Source: publisher figshare collection journal article supplement (https://springernature.figshare.com/ndownloader/files/30601560)

Acetic acid

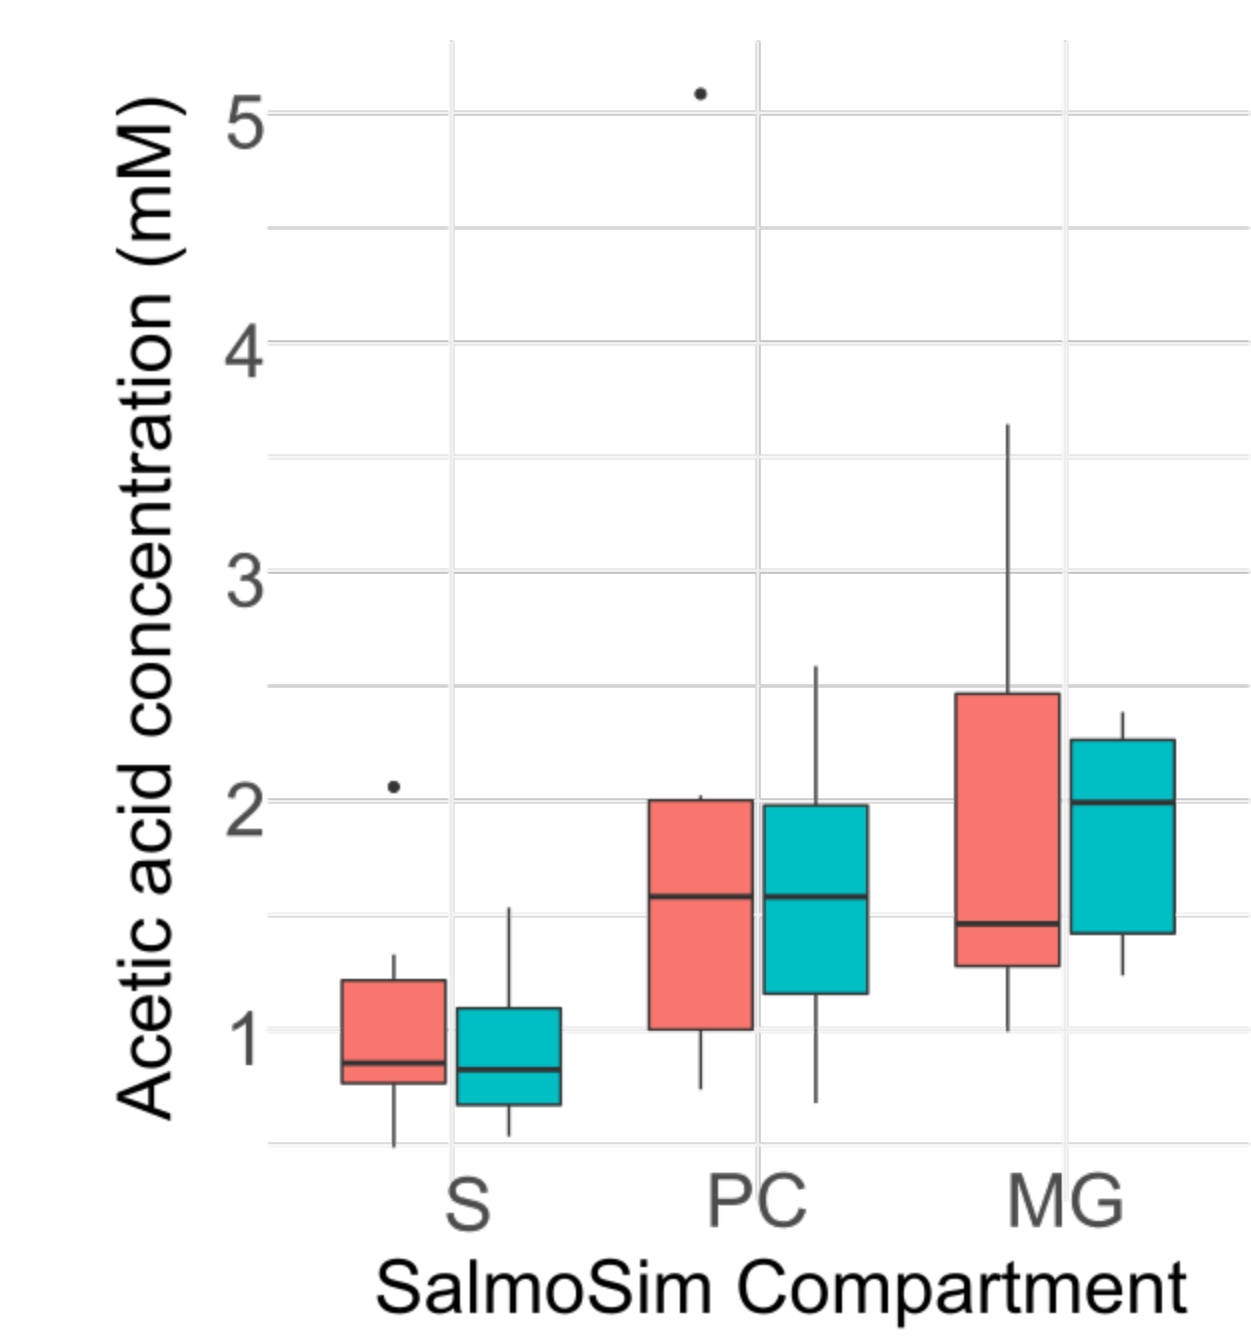

Formic acid

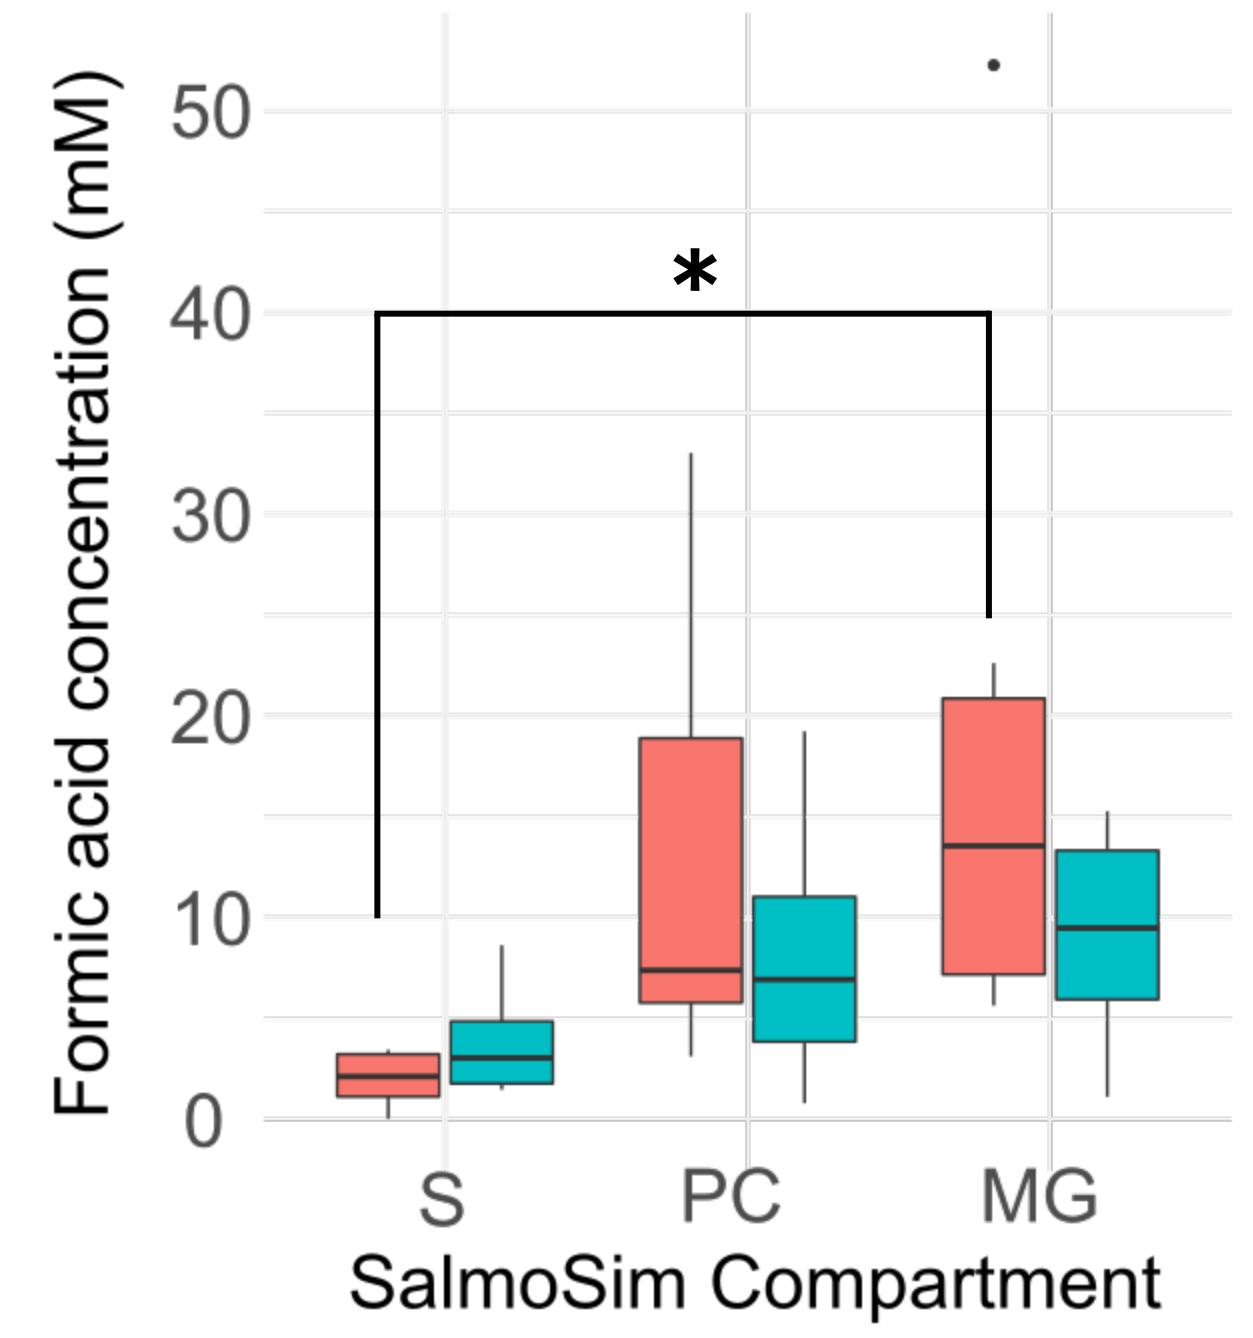

Propanoic acid

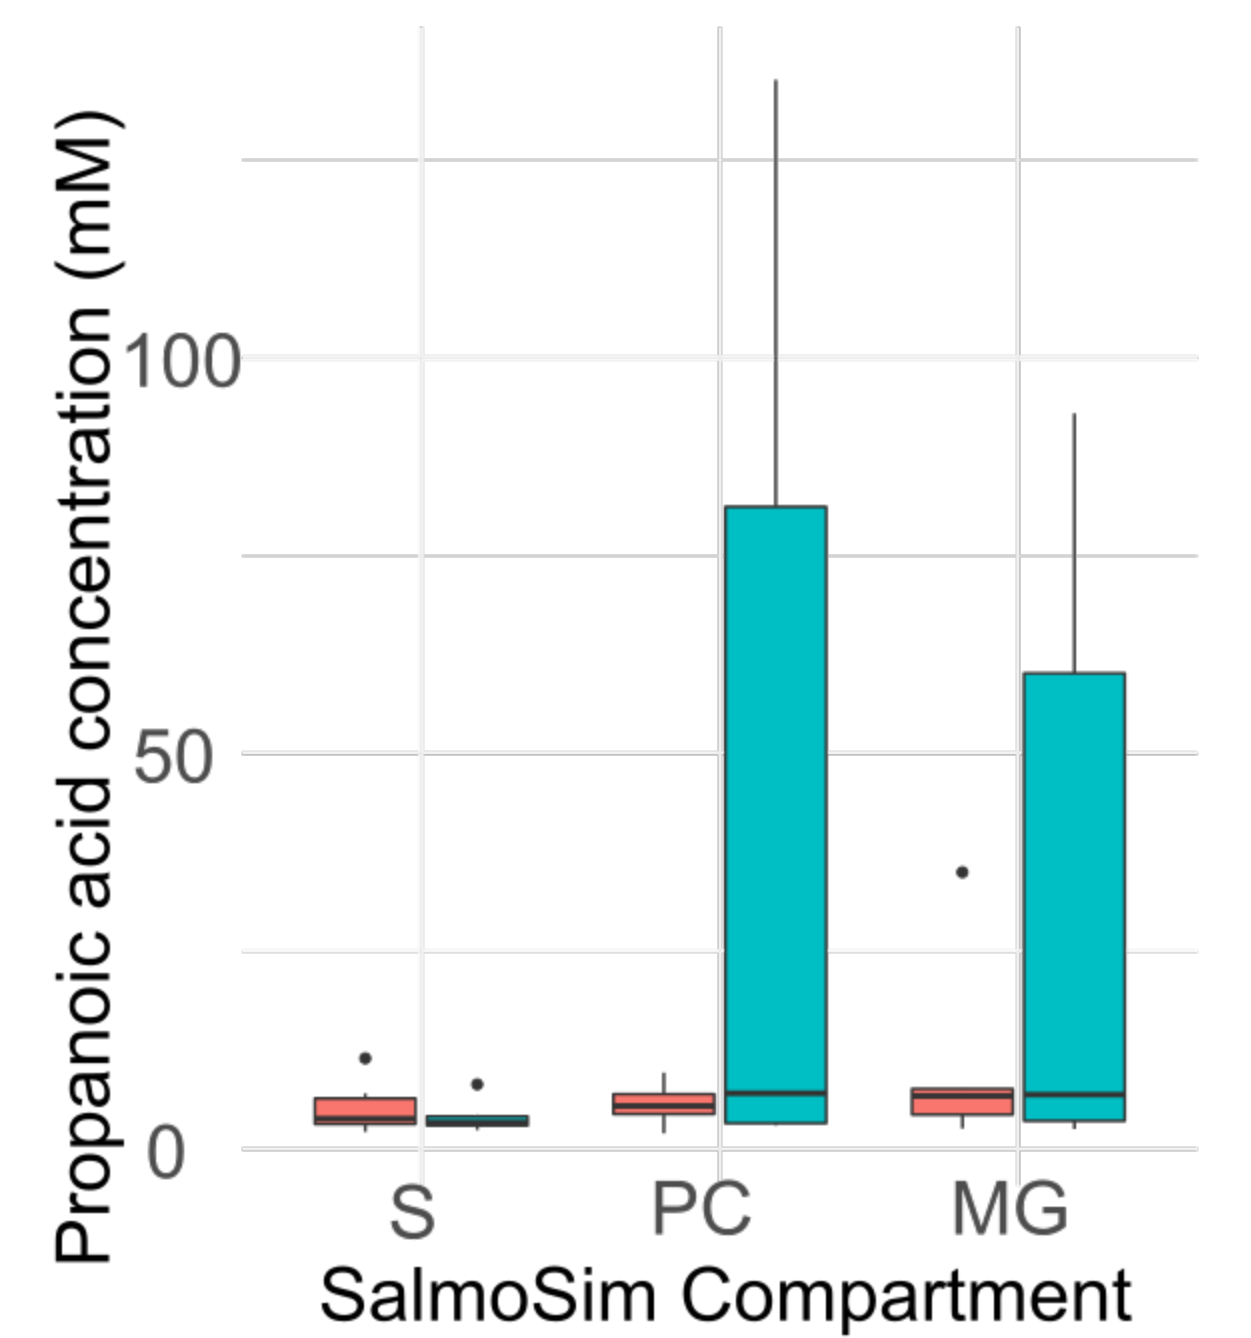

2-methyl-propanoic acid

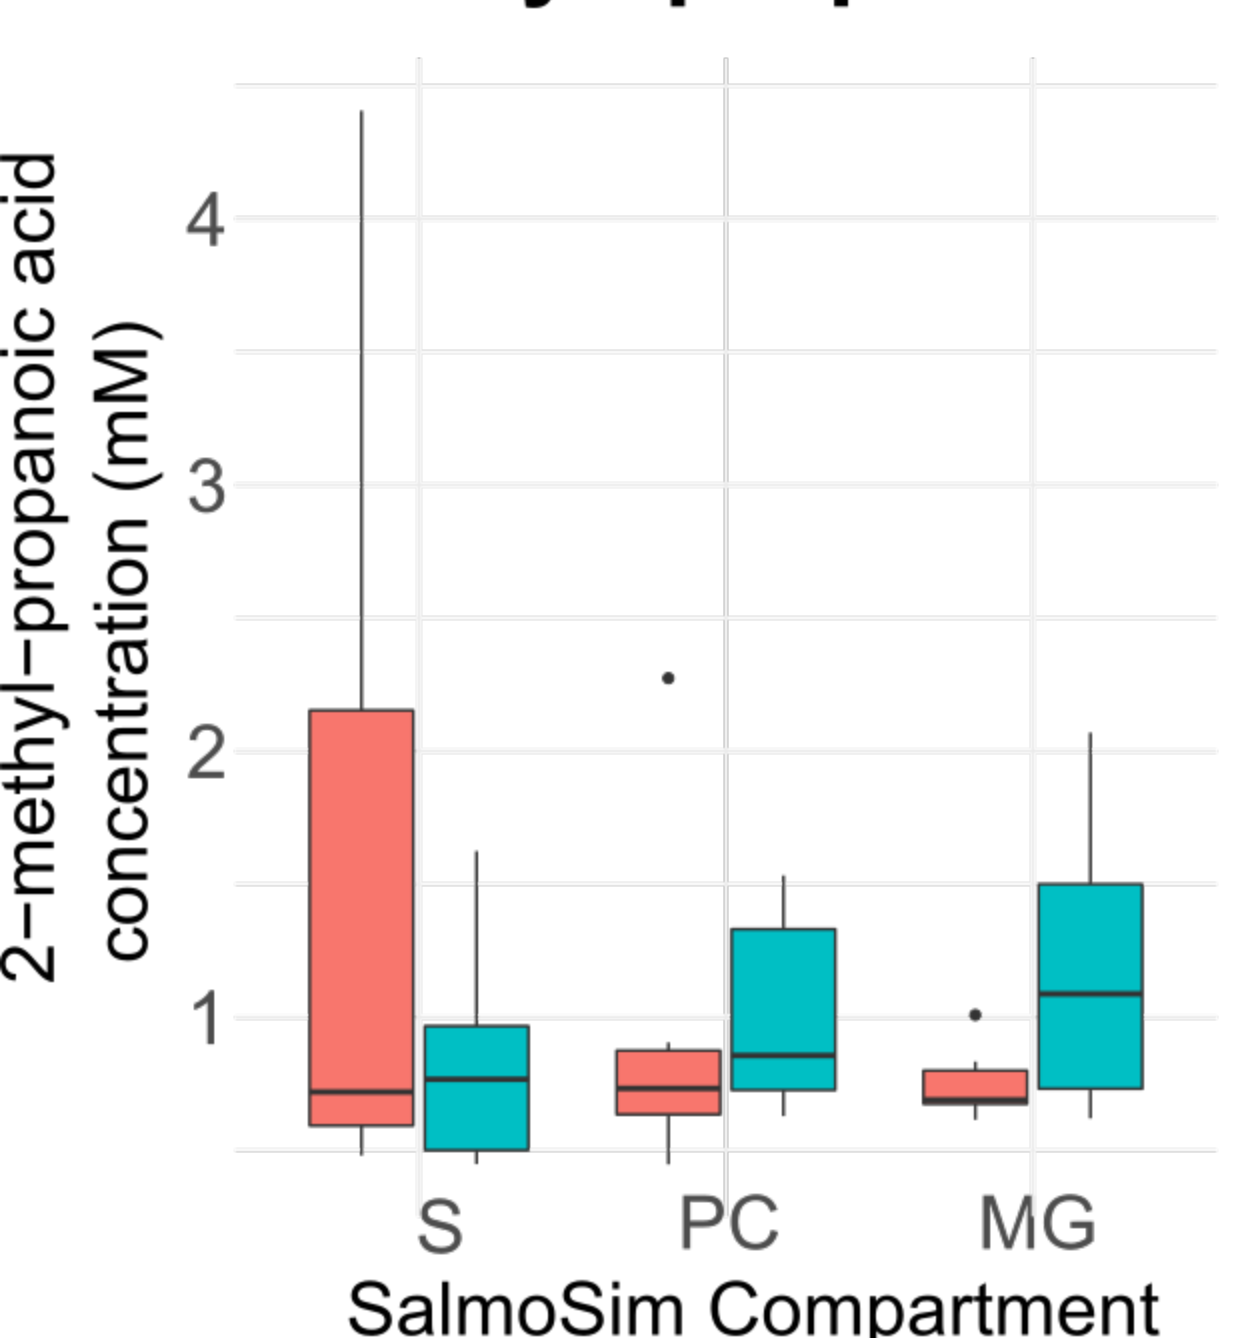

Butanoic acid

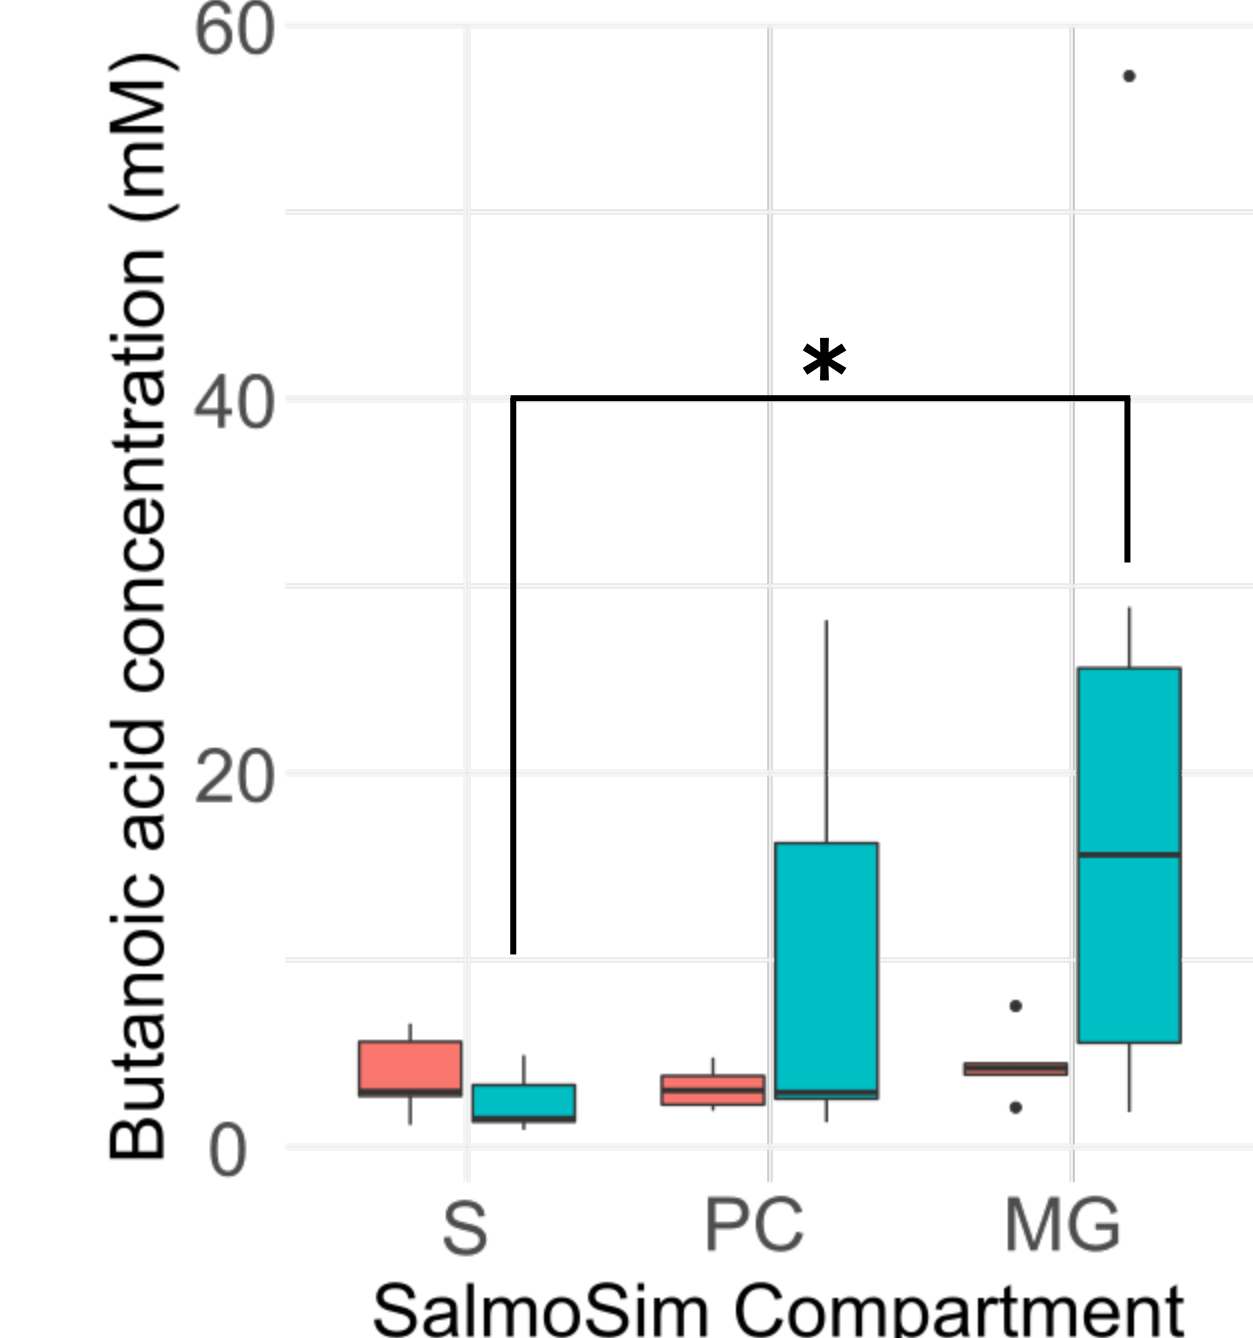

3-methylbutanoic acid

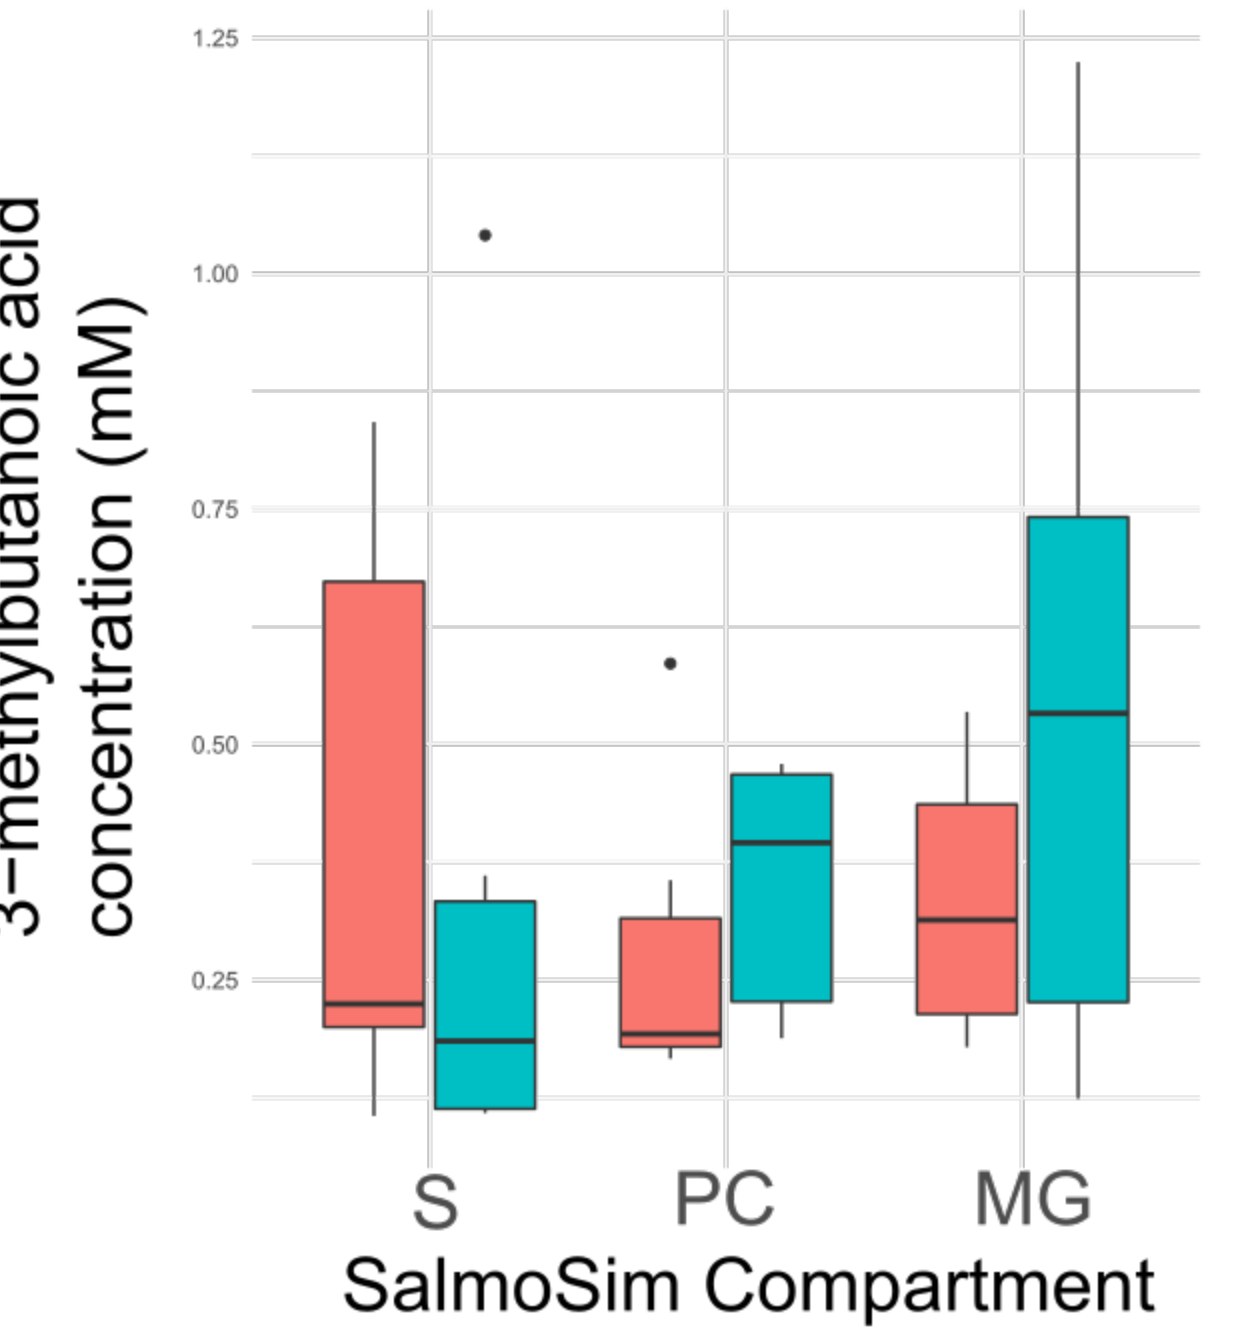

Sulfurous acid

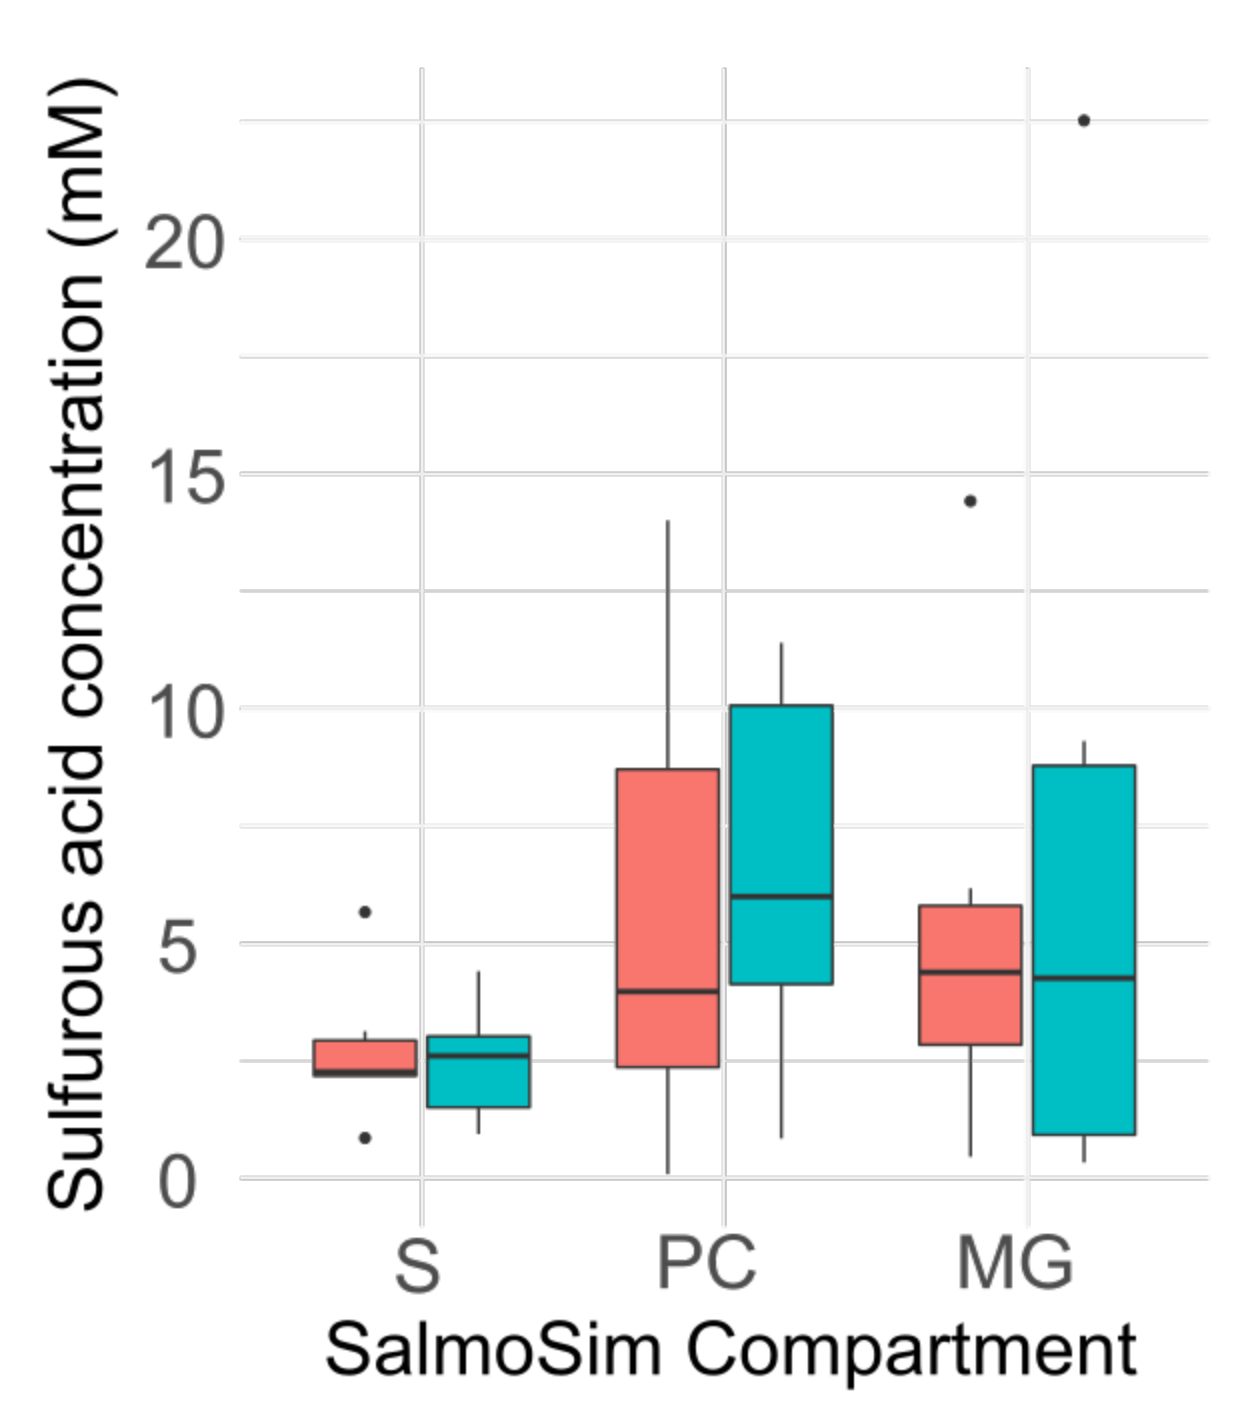

Pentanoic acid

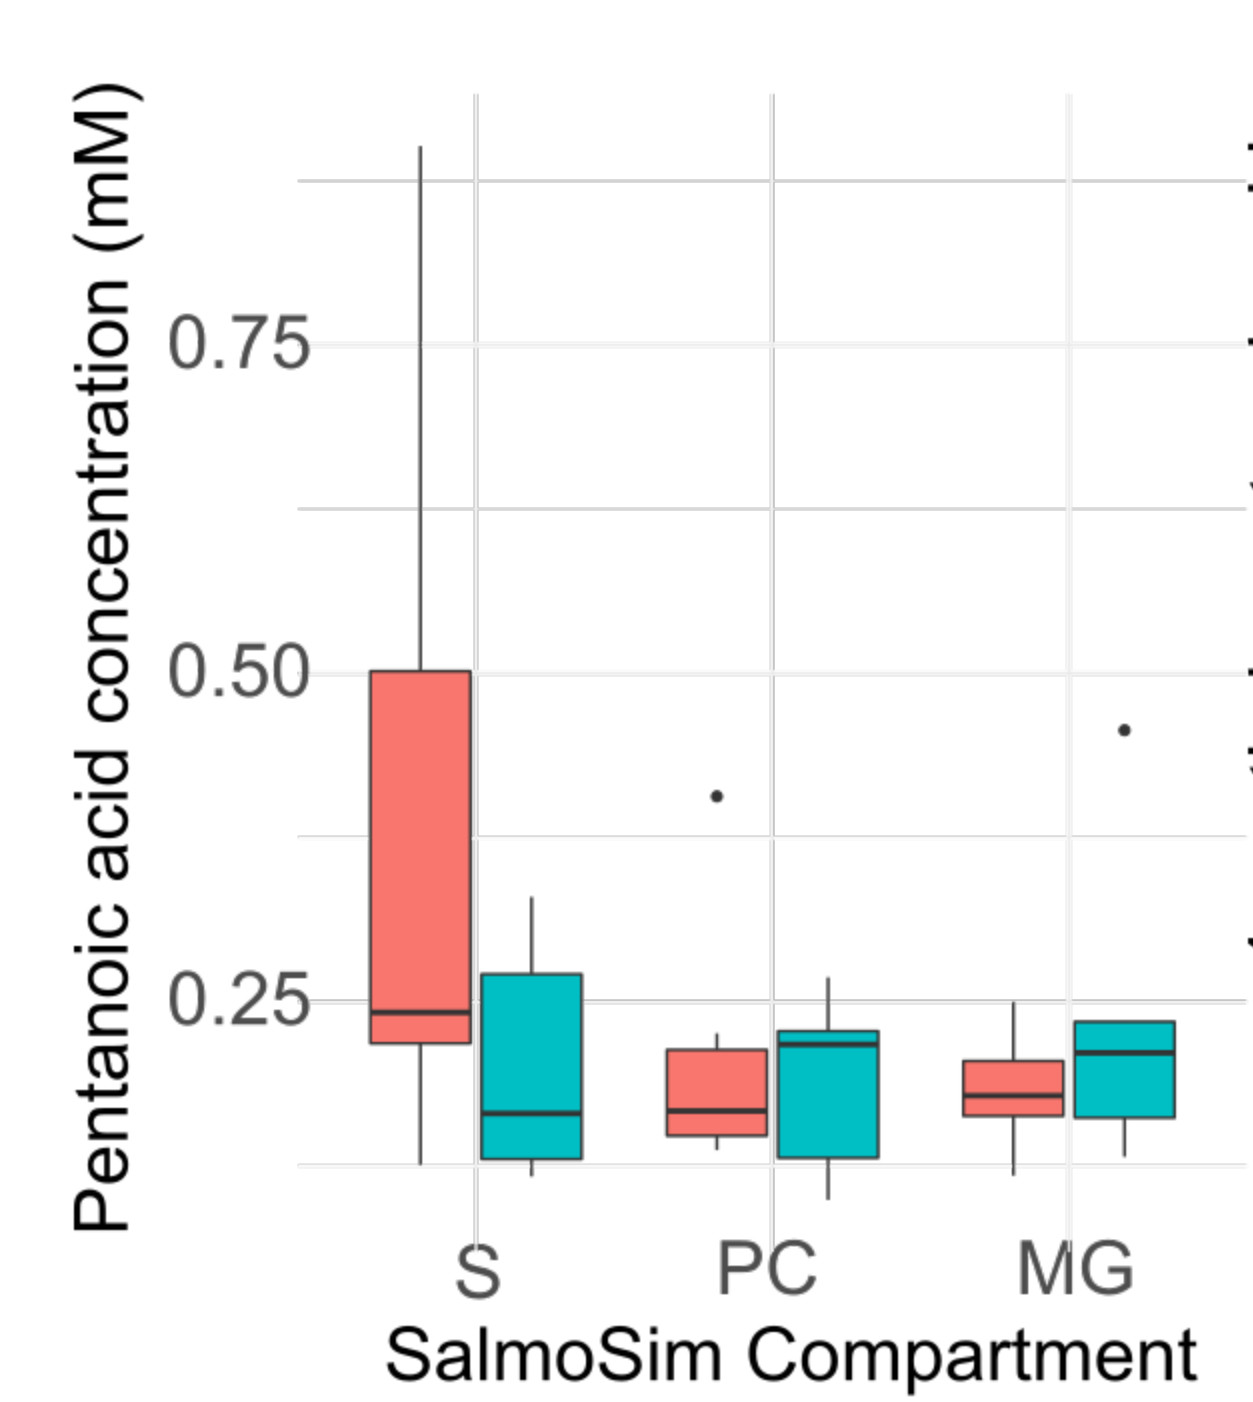

4-methyl-pentanoic acid

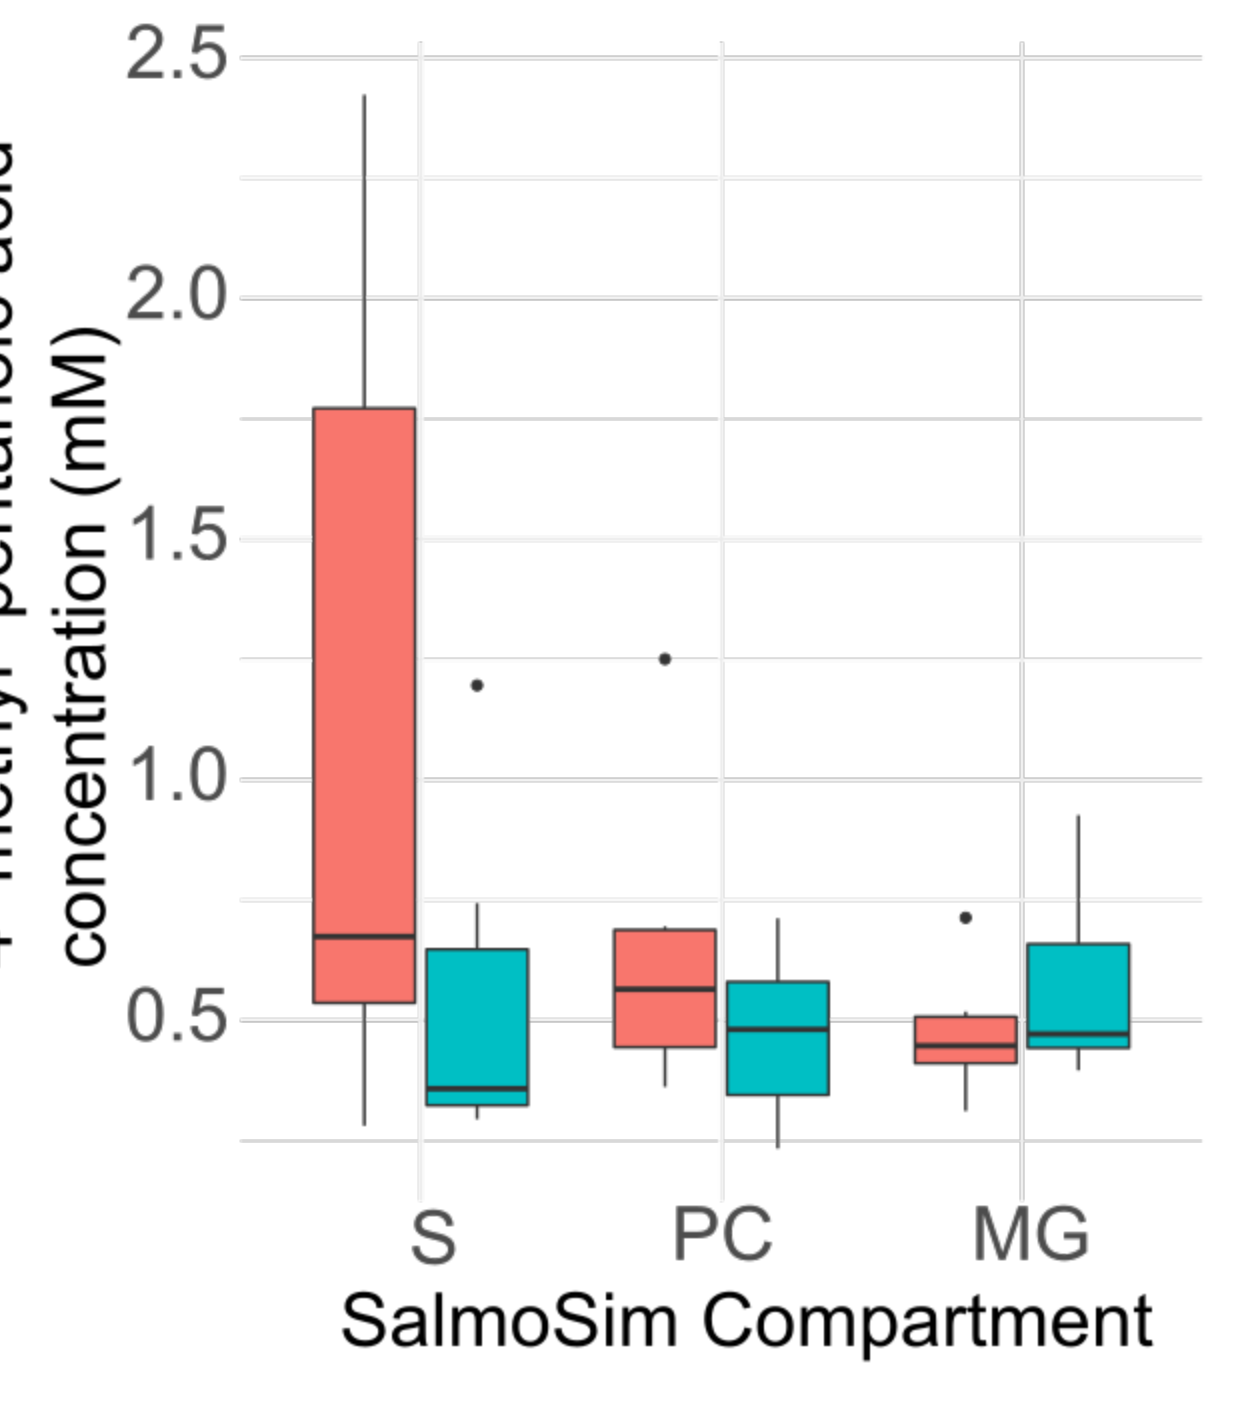

Heptanoic acid

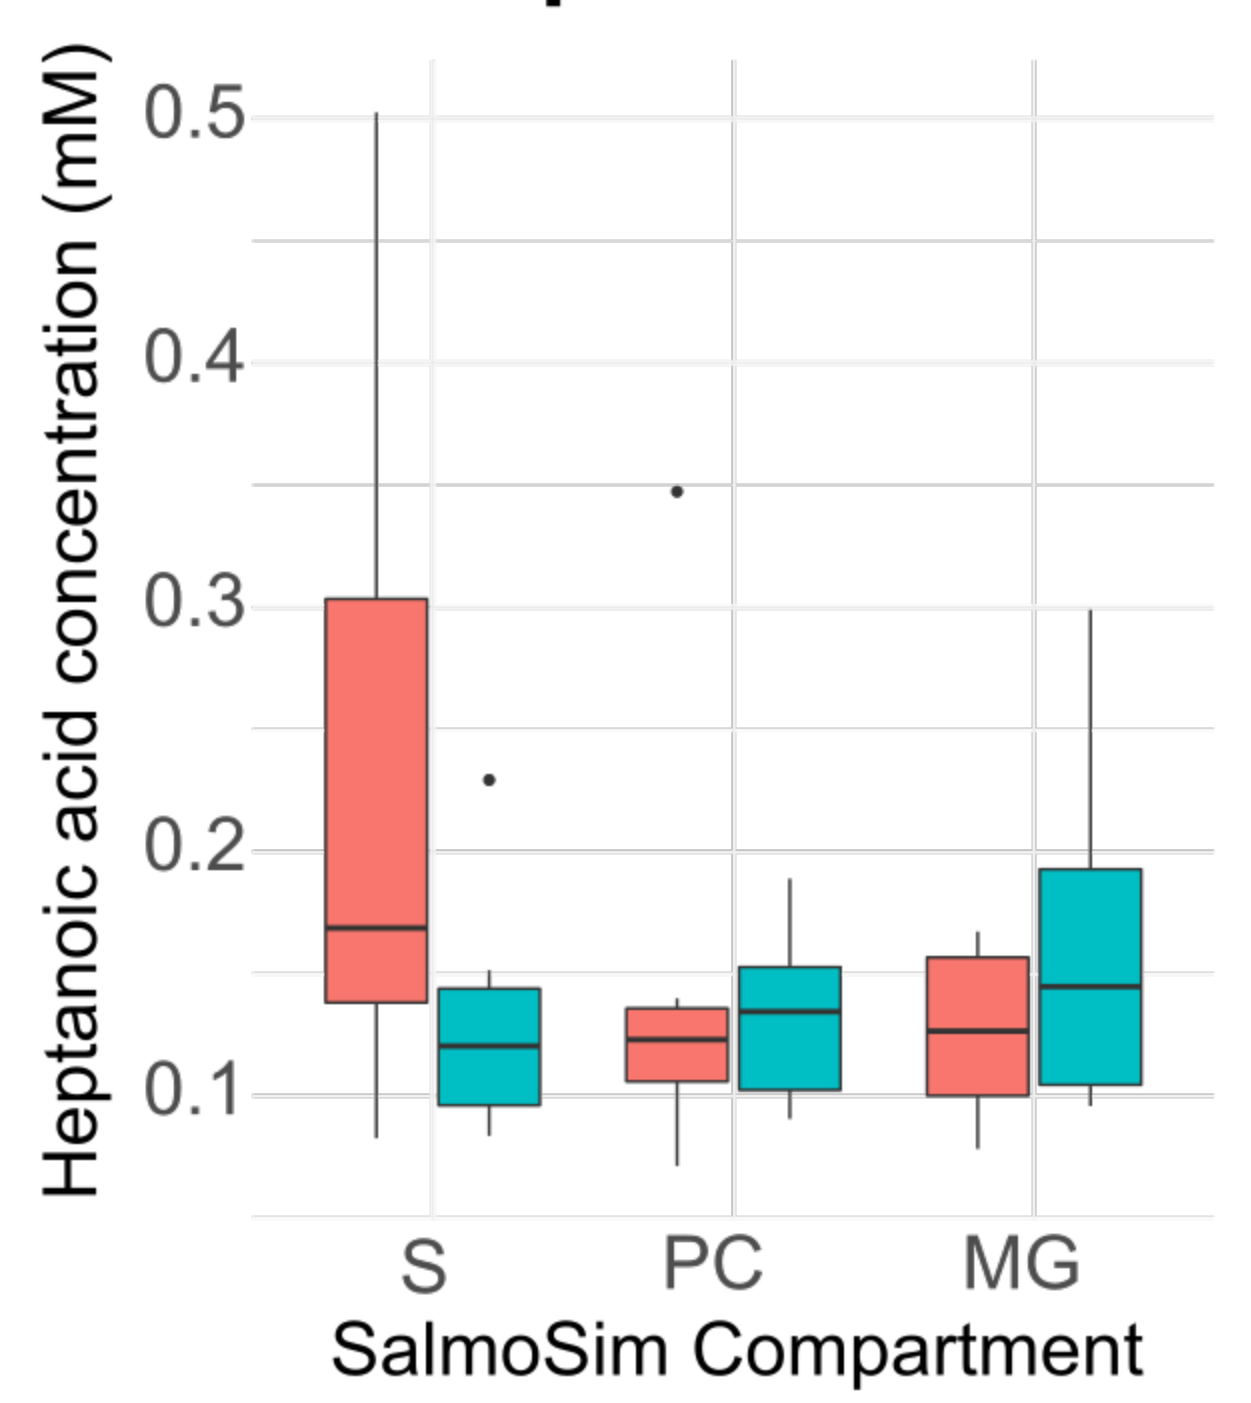

Hexanoic acid

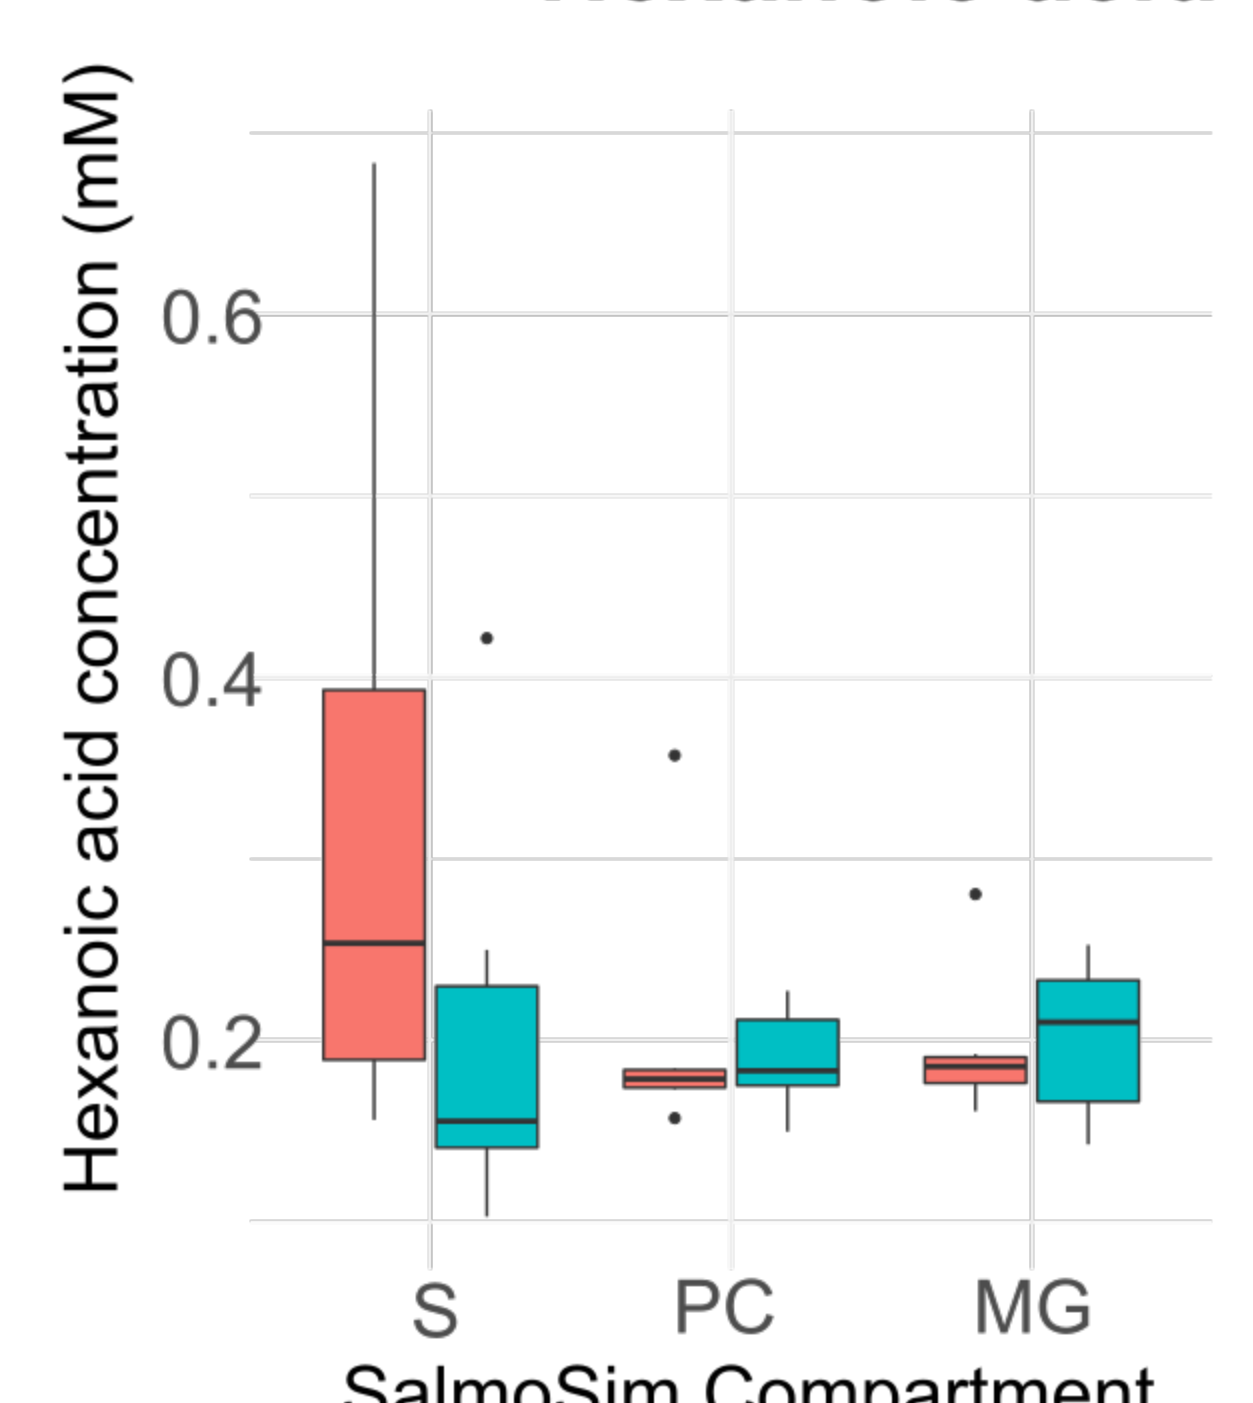

Feed

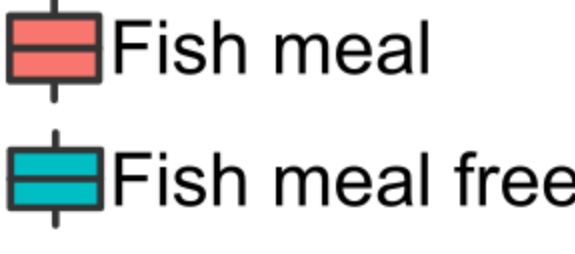

Supplement: Supplementary file [file 30601560]
